# Supplementary material for: The individual, place, and wellbeing – a network analysis
Source: BMC Public Health. 2021 Sep 6;21:1621. doi: 10.1186/s12889-021-11553-7 (PMC8419673; doi:10.1186/s12889-021-11553-7)
Supplement: Supplementary file 1 — Additional file 1 Table S1. Details of variables included in network model. [file 12889_2021_11553_MOESM1_ESM.xlsx]

## Sheet: Sheet1
Table S1. Details of variables included in network models
Variable	Question(s)	Source	Scoring	Variable type (used in analysis)	Descriptive statistics/component loadings
Crowding	Q1a. How many people live here including you?	ONS	Crowding ratio calculated by dividing # of residents by # of bedrooms (Q1a / Q14)	Continuous	M = 0.94 SD = 0.46 Min = 0.14 Max = 3.50
	Q14. How many bedrooms does your household have, including bedsitting rooms and spare bedrooms? Exclude bedrooms converted to other uses (e.g. bathroom). include bedrooms temporarily used for other things (e.g. study, playroom)	Health Survey for England			M =2.66 SD = 0.89 Min = 1 Max = 8
Gender	1b. RECORD GENDER	ONS	Male = 0; Female =1	Binary	0 = 1854 1 = 2465 (57%)
Age	1c.What was your age at last birthday?	ONS	Age in years	Continuous	M = 49.11 SD = 19.13 Min = 18.00 Max = 95.00
Occupation	1e. Which of these best describes your / (name’s) current position? [10 categories]	ONS	Currently in employment = 0; Else = 1	Binary	0 = 1745 1 = 2559 (59%)
Ethnicity	2. What is your ethnic group? [17 categories]	ONS	0 = White British or Irish, 1 = Else	Binary	0 = 3697 1 = 598 (14%)
Religiosity	4. To what extent do you agree or disagree that your personal religious beliefs or faith are important to you?	Health Survey for England	Likert 1-5 [higher = greater importance of religion]	Continuous (ordinal variable with approx. normal distribution)	M = 3.17 SD = 1.40 Min = 1.00 Max = 5.00
Marital status	5. Please can you tell me your marital or same-sex civil partnership status?	ONS	0 = Married/same-sex civil partnership; 1 = Else	Binary	0 = 1747 1 = 2559 (59%)
Education	8. What is your highest qualification?	ONS	0 = Degree; 1 = Else	Binary	0 = 6345 1 = 659 (15%)
Caring responsibilities	9. Do you look after, or give any help or support to family members, friends, neighbours or others because of either a long term physical or mental ill-health / disability or problems related to old age? Do not count anything you do as part of your paid employment.	CENSUS	0 = No caring responsibilities; 1 = Caring 1+ hours per week	Binary	0 = 3716 1 = 608 (14%)
Sexual orientation	10. Which of the options [on this card] best describes how you think of yourself? Please just read out the number next to the description	ONS	0 = Heterosexual; 1 = Else	Binary	0 = 4246 1 = 65 (1.5%)
Home ownership	11. In which of these ways does your household occupy this accommodation?	Health Survey for England	0 = Own house/ mortgage; 1 = Else	Binary	0 = 2118 1 = 2168 (50%)
Housing quality	15. During the winter months, does condensation form on the windows or walls of any room in your home apart from the bathrooms or toilets?	English Housing Survey	Likert responses transformed into single composite variable - Component scores extracted using PCA (1 component)	Continuous	Compnent loading = 0.82
	16. During the winter months, are there patches of mould or fungus in any room in your home, apart from bathrooms or toilets?	English Housing Survey			Compnent loading = 0.83
	17. During the cold winter weather, can you normally keep comfortably warm in your living room? CODE ONE ONLY	English Housing Survey			Compnent loading = 0.53
Social support/relationships	20. Not counting the people you live with, how often do you meet up in person with family members or friends?	Community Life Survey	Likert responses transformed into single composite variable - Component scores extracted using PCA (1 component)	Continuous	Compnent loading = 0.58
	21.1. If I needed help, there are people who would be there for me	Community Life Survey			Compnent loading = 0.91
	21.2. If I wanted company or to socialise, there are people I can call on	Community Life Survey			Compnent loading = 0.92
Neighbourhood cohesion	24. Using the answers on this card, please tell me how strongly you feel you belong to your immediate neighbourhood?	Community Life Survey	Likert responses transformed into single composite variable - Component scores extracted using PCA (1 component)	Continuous	Compnent loading = 0.67
	25.1 How comfortable would you be with the following? Asking a neighbour to keep a set of keys to your home for emergencies, for example if you were locked out	Community Life Survey			Compnent loading = 0.89
	25.2 How comfortable would you be with the following? If you were ill and at home on your own and needed someone to collect a few shopping essentials, asking a neighbour to do this for you	Community Life Survey			Compnent loading = 0.88
	26. Suppose you lost your purse/wallet containing your address details, and it was found in the street by someone living in this neighbourhood. How likely is it that it would be returned to you with nothing missing?	ONS			Compnent loading = 0.58
Neighbourhood disorder	28.1. I am going to read out a list of problems which some people face in their neighbourhood. For each one, please can you tell me how much of a problem it is in your neighbourhood? People being drunk or rowdy in public places	ONS	Likert responses transformed into single composite variable - Component scores extracted using PCA (1 component)	Continuous	Compnent loading = 0.80
	28.2. Rubbish or litter lying around	ONS			Compnent loading = 0.74
	28.3. Vandalism, graffiti and other deliberate damage to property or vehicles	ONS			Compnent loading = 0.80
	28.4. People being attacked or harassed because of their skin colour, ethnic origin or religion	ONS			Compnent loading = 0.69
	28.5. Teenagers hanging around on the street	ONS			Compnent loading = 0.76
	28.6. Troublesome neighbours	ONS			Compnent loading = 0.70
Greenspace usage	29.1. When did you last use or visit each of the following?A park in a town or city	CLAHRC	Likert responses transformed into single composite variable - Component scores extracted using PCA (1 component)	Continuous	Compnent loading = 0.66
	29.2. An allotment or community garden	CLAHRC			Compnent loading = 0.27
	29.3. A children’s playground	CLAHRC			Compnent loading = 0.60
	29.4. A playing field or other recreation area	CLAHRC			Compnent loading = 0.73
	29.5. Open countryside (e.g. woodland, farmland, a mountain, hill or moorland, river, lake, or canal)	CLAHRC			Compnent loading = 0.78
	29.6. A path, cycleway or bridleway	CLAHRC			Compnent loading = 0.73
	29.7. Country park	CLAHRC			Compnent loading = 0.78
	29.8. Coast/beach areas	CLAHRC			Compnent loading = 0.62
Civic agency	34. Do you agree or disagree that you can influence decisions affecting your local area? Just a reminder that your local area is within a 15 to 20 minute walk from here.	Community Life Survey	0 = Definitely/tend to agree; 1 = Tend to/definitely disagree	Binary	0 = 2221 1 = 1835 (43%)
Club agency	36. Please select from the following which best describes any groups, clubs or organisations you've taken part in, supported or helped, over the last 12 months	Citizenship survey	Count of different clubs/groups/organisations participant is inolved in (17 options)	Count	M = 0.94 SD = 1.74 Min = 0 Max = 17
Financial difficulty	56. How well would you say your household is managing financially these days? Would you say you are...?	WAS	0 = Doing well/getting by; 1 = struggling	Binary	0 = 3794 1 = 516 (12%)
Wellbeing	63.1. I’ve been feeling optimistic about the future	The Short Warwick-Edinburgh Mental Well-being Scale	Likert responses transformed into single composite variable - Component scores extracted using PCA (1 component)	Continuous	Compnent loading = 0.67
	63.2. I’ve been feeling useful	The Short Warwick-Edinburgh Mental Well-being Scale			Compnent loading = 0.75
	63.3. I’ve been feeling relaxed	The Short Warwick-Edinburgh Mental Well-being Scale			Compnent loading = 0.76
	63.4. I’ve been dealing with problems well	The Short Warwick-Edinburgh Mental Well-being Scale			Compnent loading = 0.84
	63.5. I’ve been thinking clearly	The Short Warwick-Edinburgh Mental Well-being Scale			Compnent loading = 0.84
	63.6. I’ve been feeling close to other people	The Short Warwick-Edinburgh Mental Well-being Scale			Compnent loading = 0.78
	63.7. I’ve been able to make up my own mind about things	The Short Warwick-Edinburgh Mental Well-being Scale			Compnent loading = 0.78
Self-reported physical health	72. To help people say how good or bad their health state is, we have drawn a scale (rather like a thermometer) on which the best state you can imagine is marked 100 and the worst state you can imagine is marked 0. We would like you to indicate on this scale how good or bad your own health is today, in your opinion	EQ-5D-3L	A 100-point self-report scale	Continuous	M = 70.63 SD = 1.74 Min = 0 Max = 100
